# Supplementary material
Source: Springer Nature journal article supplement (https://www.springermedizin.de/resource/supplementary/12888_2006_157_MOESM1_ESM.pdf/9482012)

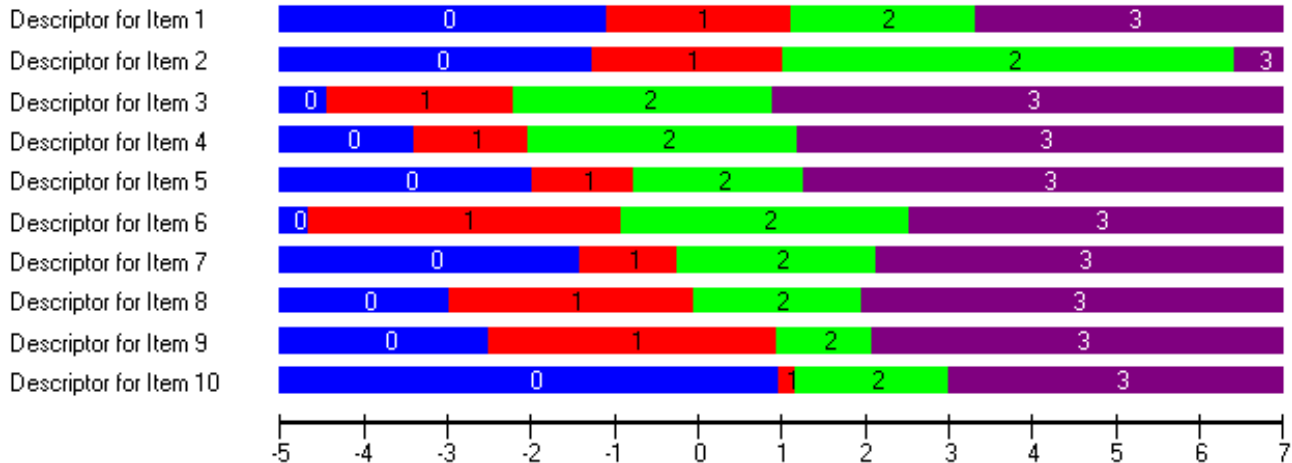

\*\* = Reversed thresholds

Supplement: MOESM1 [file 9482012]
